# Supplementary material for: Comparative Analysis of Tumor-Associated microRNAs and Tetraspanines from Exosomes of Plasma and Ascitic Fluids of Ovarian Cancer Patients
Source: MDPI journal article supplement (doi:10.3390/ijms24010464), 2022-12-27
Supplement: s1 [file s1]

**Table S1.** Expression of CD63, CD81 and CD24 on the surface of CD9-positive exosomes from blood plasma (HFs, OCPs) and ascites (OCPs).

| Source of exosomes |         | CD63 expression | CD81 expression | CD24 expression   |
|--------------------|---------|-----------------|-----------------|-------------------|
| HFs                | Plasma  | 530 [490; 600]  | 715 [630;850]   | 960 [750; 1100]   |
| OCPs               | Plasma  | 850 [700; 950]  | 950 [880; 1200] | 1350 [1050; 1500] |
|                    | Ascites | 890 [800; 1200] | 950 [880; 1230] | 2300 [2000; 2555] |
|                    |         | p=0.005         | p=0.056         | p=0.004           |

Note: Data represented median fluorescence intensity (MFI) with 25-75%. Kruskal-Wallis test was used.

**Table S2.** The level of exosomal miR-101 in plasma and ascites in patients with OC in relation to clinical parameters, Medians (27-75%).

| Parameters, n               | Plasma miR-101 level | P-level | Ascites miR-101 level    | P-level     |
|-----------------------------|----------------------|---------|--------------------------|-------------|
| <b>Age (years),</b>         |                      |         |                          |             |
| <56, n = 10                 | 7.03 [6.35; 7.71]    | 0.89    | 6.77 [5.70; 7.20]        | 0.42        |
| ≥56, n = 10                 | 7.27 [6.13; 7.78]    |         | 6.93 [6.41; 8.05]        |             |
| <b>FIGO Stage</b>           |                      |         |                          |             |
| IIB-IIIAB, n = 5            | 7.25 [5.80; 7.75]    | 0.94    | <b>5.41 [3.49; 6.09]</b> | <b>0.03</b> |
| IIIC, n = 15                | 6.99 [6.35; 7.60]    |         | <b>7.05 [6.50; 7.40]</b> |             |
| <b>Family history,</b>      |                      |         |                          |             |
| Yes, n = 4                  | 6.67 [5.73; 7.61]    | 0.63    | 7.12 [7.04; 7.20]        | 0.63        |
| No, n = 16                  | 7.21 [6.35; 7.23]    |         | 6.65 [5.90; 7.53]        |             |
| <b>Ascites volume (mL),</b> |                      |         |                          |             |
| <200 mL, n = 5              | 6.47 [6.04; 6.89]    | 0.53    | 6.10 [5.50; 6.77]        | 0.14        |
| 200-1000 mL, n = 5          | 6.86 [6.13; 7.78]    |         | 7.62 [6.65; 8.62]        |             |
| >1000ml, n = 10             | 7.57 [5.80; 7.71]    |         | 7.20 [6.30; 7.40]        |             |
| <b>PCI, RU</b>              |                      |         |                          |             |
| ≤9, n = 10                  | 6.98 [6.35; 7.75]    | 0.80    | 6.65 [5.70; 8.00]        | 0.44        |
| >9, n = 10                  | 7.18 [6.04; 7.66]    |         | 7.12 [6.77; 7.30]        |             |

Note: RU – Relative Units, PCI – peritoneal canceromatosis index

**Table S3.** The level of exosomal miR-24 in plasma and ascites in patients with OC in relation to clinical parameters, Medians (27-75%).

| Parameters, n               | Plasma miR-24 level  | P-level | Ascites miR-24 level  | P-level |
|-----------------------------|----------------------|---------|-----------------------|---------|
| <b>Age (years),</b>         |                      |         |                       |         |
| <56, n = 10                 | -6.45 [-7.40; -5.75] | 0.67    | -5.70 [-8.61; -3.64]  | 0.75    |
| ≥56, n = 10                 | -6.39 [-9.10; -4.80] |         | -5.55 [-9.00; -5.00]  |         |
| <b>FIGO Stage</b>           |                      |         |                       |         |
| IIB-IIIAB, n = 5            | -6.86 [-8.00; -0.80] | 0.89    | -3.77 [-10.80; -2.24] | 0.78    |
| IIIC, n = 15                | -6.39 [-7.59; -5.75] |         | -5.70 [-8.80; -5.00]  |         |
| <b>Family history,</b>      |                      |         |                       |         |
| Yes, n = 4                  | -5.75 [-8.00; -5.20] | 1.00    | -3.64 [-4.48; -3.41]  | 1.00    |
| No, n = 16                  | -6.45 [-8.00; -4.80] |         | -5.70 [-9.00; -3.77]  |         |
| <b>Ascites volume (mL),</b> |                      |         |                       |         |
| <200 mL, n = 5              | -6.00 [-6.30; -5.75] | 0.35    | -5.50 [-5.70; -3.64]  | 0.43    |
| 200-1000 mL, n = 5          | -7.91 [-8.66; -6.20] |         | -8.90 [-9.55; -5.61]  |         |
|                             | -6.45 [-7.40; -4.30] |         | -5.33 [-8.61; -3.77]  |         |

|                 |                      |      |                       |      |
|-----------------|----------------------|------|-----------------------|------|
| >1000ml, n = 10 |                      |      |                       |      |
| <b>PCI, RU</b>  |                      |      |                       |      |
| ≤9, n = 10      | -7.80 [-8.22; -6.00] | 0.35 | -8,90 [-10.11; -5.70] | 0.22 |
| >9, n = 10      | -6.39 [-7.40; -4.80] |      | -5.33 [-8.61; -3.64]  |      |

Note: RU – Relative Units, PCI – peritoneal canceromatosis index

**Table S4.** Sequences of primers and probes used for reverse transcription and TaqMan qPCR.

| miRNA                        | Label   | Sequence                                                         |
|------------------------------|---------|------------------------------------------------------------------|
| Universal Reverse Primer     |         | 5'-GTGCAGGGTCCGAGGT-3'                                           |
| hsa-miR-16-5p<br>(miR-16)    | RT      | 5'-<br>GTCGTATCCAGTGCAGGGTCCGAGGTATTCGCACTGGATACGACCGCCAA-<br>3' |
|                              | Reverse | 5'-GCCCGTAGCAGCACGTAAATAT-3'                                     |
|                              | Probe   | 5'-(FAM)-GCACTGGATACGACCGCCAA-(BHQ1)-3'                          |
| hsa-miR-24-3p<br>(miR-24-3p) | RT      | 5'-<br>GTCGTATCCAGTGCAGGGTCCGAGGTATTCGCACTGGATACGACCTGTTC-3'     |
|                              | Reverse | 5'-TGGCTCAGTTCAGCAG-3'                                           |
|                              | Probe   | 5'-(FAM)-CGCACTGGATACGACCTGTTC-(BHQ1)-3'                         |
| hsa-mir-101<br>(miR-101)     | RT      | 5'-<br>GTCGTATCCAGTGCAGGGTCCGAGGTATTCGCACTGGATACGACTTCAGT-3'     |
|                              | Reverse | 5'-CGCCC TACAGTACTGTGATAA-3'                                     |
|                              | Probe   | 5'-(FAM)-CGCACTGGATACGACTTCAGT-(BHQ1)-3'                         |
